# Supplementary material for: Oxidation of benzyl alcohol by pyridinium dichromate in acetonitrile. Using the para/meta ratio of substituent effects for mechanism elucidationElectronic supplementary information (ESI) available: Table S1 containing kinetic data for establishing rate laws. See http://www.rsc.org/suppdata/p2/b2/b200742h/
Source: Royal Society of Chemistry journal article supplement (doi:10.1039/b200742h), 2002-04-16
Supplement: b200742h.doc [file b200742h.doc]

Supplementary data

| **Table S1** Experimental first-order rate constants *k*obs for the consumption of Cr2VI species in the oxidation of benzyl alcohol (BnOH) with pyridinium dichromate (PDC) in acetonitrile acidified with trichloroacetic acid (TCA) at 303.15 K. Entries *1**5* show pseudo-first-order kinetics with respect to PDC. Entries *6**10* and *11**15* evidence first-order kinetics with respect to BnOH and TCA, respectively. Entries *1*, *8* and *15* are referred to the same experiment. | | | | | | |
| --- | --- | --- | --- | --- | --- | --- |
| Entry | [PDC] 0 /  mmol dm3 | [BnOH] 0 /  mmol dm3 | [TCA] 0 /  mmol dm3 | *k*obs /  103 s1 | (*k*obs/[BnOH] 0) /  103 dm3 mol1 s1 | (*k*obs/[TCA] 0) /  103 dm3 mol1 s1 |
| *1* | 1.0 | 30 | 68 | 3.75 |  |  |
| *2* | 1.5 | 30 | 68 | 3.38 |  |  |
| *3* | 2.0 | 30 | 68 | 3.47 |  |  |
| *4* | 2.5 | 30 | 68 | 3.63 |  |  |
| *5* | 3.0 | 30 | 68 | 3.79 |  |  |
| *6* | 1.0 | 10 | 68 | 1.25 | 125 |  |
| *7* | 1.0 | 20 | 68 | 2.23 | 112 |  |
| *8* | 1.0 | 30 | 68 | 3.75 | 125 |  |
| *9* | 1.0 | 40 | 68 | 5.12 | 128 |  |
| *10* | 1.0 | 50 | 68 | 6.30 | 126 |  |
| *11* | 1.0 | 30 | 17.5 | 0.98 |  | 56 |
| *12* | 1.0 | 30 | 27.5 | 1.51 |  | 55 |
| *13* | 1.0 | 30 | 41 | 2.27 |  | 55 |
| *14* | 1.0 | 30 | 55 | 3.07 |  | 56 |
| *15* | 1.0 | 30 | 68 | 3.75 |  | 55 |
